# Supplementary material for: Prostaglandin E2 Receptor, EP3, Is Induced in Diabetic Islets and Negatively Regulates Glucose- and Hormone-Stimulated Insulin Secretion
Source: PubMed Central journal article supplement — Diabetes. 2013 May 20;62(6):1904–12. doi: 10.2337/db12-0769 (PMC3661627; doi:10.2337/db12-0769), 2013-05-20

## SUPPLEMENTARY DATA

**Supplementary Table 1.** Donor Demographics for human islet samples used in GSIS assays in Figure 3. If a value is missing, it was not known.

| Sample name         | BMI  | Age         | Sex         | Race     | Cold Ischemia (min) | Time to shipment (hours) | Purity | Viability | Batch Type | Type Of Islets                            | Institution                    | Shipped  | Delivered |
|---------------------|------|-------------|-------------|----------|---------------------|--------------------------|--------|-----------|------------|-------------------------------------------|--------------------------------|----------|-----------|
| ND1                 | 34.4 | 48          | M           | White    |                     | 69                       | 80%    | 99%       | Most Pure  | Cultured                                  | University of Minnesota        | 11/3/10  | 11/4/10   |
| ND2                 | 30   | 64          |             |          | 841                 | 118                      | 85%    | 95%       | Most Pure  | Cultured                                  | The Scharp/Lacy Institute      | 11/17/10 | 11/18/10  |
| ND3                 | 33.1 | 49          | F           | White    | 258                 | 26                       | 92%    | 99%       | Most Pure  | Cultured                                  | University of Minnesota        | 12/10/10 | 12/11/10  |
| ND4                 | 27.4 | 39          | M           | White    |                     |                          | 98%    | 99%       | Most Pure  | Cultured                                  | Massachusetts General Hospital | 2/22/11  | 2/23/11   |
| ND5-xylitol         | 28.8 | 20          | M           | White    | 308                 | 24.5                     | 90%    | 95%       | Most Pure  | Cultured                                  | The Scharp/Lacy Institute      | 3/1/11   | 3/2/11    |
| ND6-xylitol         | 31.6 | 51          | F           | White    | 308                 | 95                       | 90%    | 96%       | Most Pure  | Cultured                                  | University of Pennsylvania     | 3/7/11   | 3/8/11    |
| ND7-xylitol         | 23.2 | 61          |             |          |                     | 36                       | 90%    | 97%       | Most Pure  | Cultured                                  | University of Illinois         | 3/10/11  | 3/11/11   |
| T2D1                | 38   | 54          | M           |          |                     |                          | 80%    | 95%       | Most Pure  | Cultured Confirmed Type II Diabetic Donor | The Scharp/Lacy Institute      | 1/14/11  | 1/15/11   |
| T2D2                | 50   | 52          | M           | White    |                     |                          | 80%    | 92%       | Most Pure  | Cultured Confirmed Type II Diabetic Donor | The Scharp/Lacy Institute      | 2/14/11  | 2/15/11   |
| T2D3                | 34   | 66          | M           | White    |                     |                          | 95%    | 99%       | Most Pure  | Cultured Confirmed Type II Diabetic Donor | Massachusetts General Hospital | 2/14/11  | 2/15/11   |
| T2D4                | 33.5 | 44          | M           | Hispanic |                     |                          | 80%    | 95%       | Most Pure  | Cultured Confirmed Type II Diabetic Donor | The Scharp/Lacy Institute      | 5/10/11  | 5/11/11   |
| <b>t-test</b>       |      |             |             |          |                     |                          |        |           |            |                                           |                                |          |           |
| <b>(ND vs T2D):</b> |      | <b>0.03</b> | <b>0.44</b> |          |                     |                          |        |           |            |                                           |                                |          |           |
| <b>Mean ND:</b>     |      | <b>30</b>   | <b>47</b>   |          |                     |                          |        |           |            |                                           |                                |          |           |
| <b>Mean T2D:</b>    |      | <b>39</b>   | <b>54</b>   |          |                     |                          |        |           |            |                                           |                                |          |           |

**Supplementary Figure 1.** The EP3 antagonist, L-798,106, causes a dose-dependent increase in GSIS in islets isolated from diabetic BTBR mice. Increasing the concentration of L-798,106 100-fold, from 100 nM to 10  $\mu$ M, elicits a significant potentiation of GSIS. The 10  $\mu$ M or 20  $\mu$ M concentration was chosen for all further experiments. (n=3; \*, p<0.05).

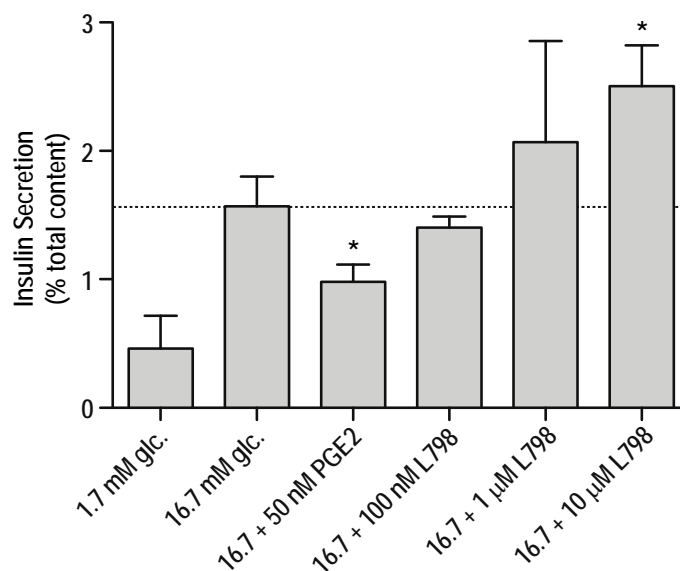

SUPPLEMENTARY DATA

**Supplementary Figure 2.** The EP3 receptor is expressed in Ins-1 832/3 cells, which are highly responsive to cAMP stimulation. (A) EP3 qRT-PCR product is expressed in all PCR reactions in a 100X cDNA dilution series, from 20 ng to 0.2 ng input cDNA. The  $G\alpha_s$ -coupled EP4 is also expressed in these reactions, but only at the highest concentration of cDNA, whereas the PCR product in the 2 ng reaction is primer dimer. (B) EP3 mRNA is expressed at similar levels in all Ins-1-derived rat insulinoma cell lines, being slightly reduced in the RinM5F rat insulinoma cell line. (C) The Ins-1 (832/3) cell line is highly responsive to cAMP agonists like GLP-1 to promote GSIS. GSIS assays were performed in the presence of 11 mM glucose with increasing concentrations of GLP-1. The GSIS effect in 11 mM glucose alone was set at 100 percent; GLP-1 potentiated the effect of glucose by another 100%. In this experiment, the ability of GLP-1 to compete with 70 nM Exendin 9-39, an inverse agonist of the GLP-1 receptor, was also tested. Exendin 9-39 acts as a competitive antagonist by shifting the EC50 to the right, while having little effect on the maximal effect of GLP-1.

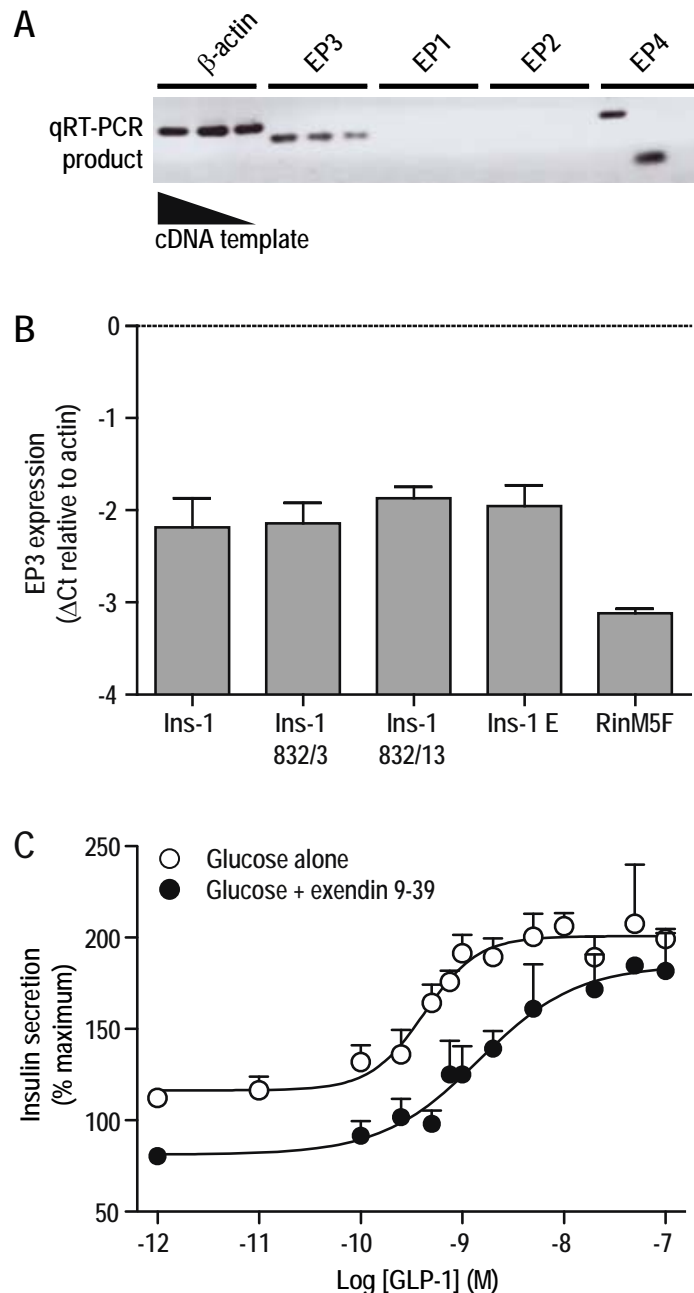

SUPPLEMENTARY DATA

**Supplementary Figure 3.** The expression patterns of the EP receptor family and PGE2 synthetic enzymes are similar in the mouse  $\alpha$ -cell-derived line,  $\alpha$ TC1, and  $\beta$ -cell-derived line, Min6, as compared to isolated mouse islets. Copy DNA was generated from RNA samples derived from the indicated cell lines and subjected to qRT-PCR analysis with primers specific for  $\beta$ -actin or the indicated genes. Ct values were normalized to  $\beta$ -actin and to a control RNA sample that had not been subjected to cDNA synthesis (no-RT control). All primer sets except those for EP2 elicited a significant amplification above control in all samples. The  $\Delta$ Ct values for isolated lean mouse islets is shown in black bars as a comparison. The gene expression patterns are all similar for lean islets, Min6 cells, and  $\alpha$ TC1 cells. Technical replicates were performed in duplicate, and the values for each primer set were averaged before subtracting from the average of the  $\beta$ -actin values for that sample.

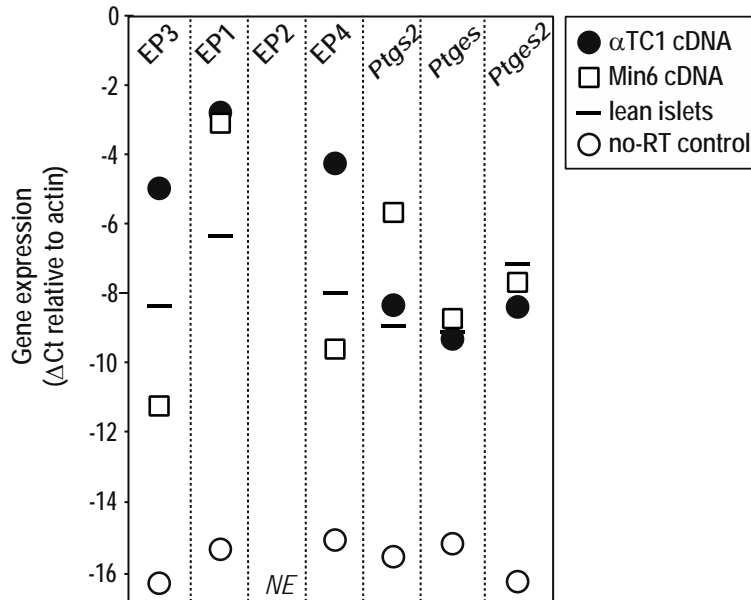

Supplement: supp_db12-0769_DB120769SupplementaryData.pdf [file supp_db12-0769_DB120769SupplementaryData.pdf]
